# Supplementary material for: Synthesis, characterisation and evaluation of hyperbranched N-(2-hydroxypropyl) methacrylamides for transport and delivery in pancreatic cell lines in vitro and in vivo
Source: Royal Society of Chemistry journal article supplement (doi:10.1039/d1bm01548f), 2022-01-01
Supplement: d1bm01548f1.pdf [file d1bm01548f1.pdf]

## Synthesis, characterisation and evaluation of hyperbranched N-(2-hydroxypropyl) methacrylamides for transport and delivery in pancreatic cell lines *in vitro* and *in vivo*

Akosua B. Anane-Adjei,<sup>a</sup> Nicholas L. Fletcher,<sup>b</sup> Robert J. Cavanagh,<sup>a</sup> Zachary H. Houston,<sup>b</sup> Theodore Crawford,<sup>b</sup> Amanda K. Pearce,<sup>a</sup> Vincenzo Taresco,<sup>a</sup> Alison A. Ritchie,<sup>c</sup> Phillip Clarke,<sup>c</sup> Anna M. Grabowska,<sup>c</sup> Paul R. Gellert,<sup>d</sup> Marianne B. Ashford,<sup>e</sup> Barrie Kellam,<sup>a</sup> Kristofer J. Thurecht<sup>b\*</sup> and Cameron Alexander.<sup>a\*</sup>

### Contents

|                                                                                                                                                                                                                                                 |   |
|-------------------------------------------------------------------------------------------------------------------------------------------------------------------------------------------------------------------------------------------------|---|
| Table S1 Reaction conditions used for the synthesis of the hyperbranched HPMA polymers                                                                                                                                                          | 4 |
| Table S2 Details of physical properties of different batches of the hyperbranched polymers.                                                                                                                                                     | 4 |
| Figure S1 Representative <sup>1</sup> H NMR spectrum of hyperbranched HPMA polymer (HB-HPMA) in DMSO-d <sub>6</sub> .                                                                                                                           | 4 |
| Figure S2 Representative SEC-MALLS traces of (A) HB-HPMA polymers (HB-HPMA-20) and (B) HB-HPMA-GEM polymers.                                                                                                                                    | 5 |
| Figure S3 <sup>1</sup> H NMR spectrum of HPMA-GEM monomer in DMSO-d <sub>6</sub>                                                                                                                                                                | 6 |
| Figure S4 FT-IR spectra of (A) GEM, (B) control HPMA polymer and (C) HPMA-GEM prodrug polymer.                                                                                                                                                  | 6 |
| Figure S5. In vitro 2D cell viability assay at 72h post-treatment with different concentrations of the three HB-HPMA polymers on MIA PaCa-2 pancreatic cancer cell line using trypan blue dye exclusion test of cell viability.                 | 7 |
| Figure S6 Evaluation of HB-HPMA polymers biocompatibility in RAW 264.7 macrophages polymers applied in 10 % FBS/DMEM for 24 hours, (1) PrestoBlue™ cell metabolic assay (2) LDH release assay. Data are presented as mean ± S.D (N = 3, n = 3). | 7 |
| Figure S7 PET-CT imaging of <sup>89</sup> Zr-labelled HB-HPMA polymers in MIA PaCa-2 xenograft models. Representative two orientation maximum intensity projection (MIP) images of all                                                          |   |

three polymers showing the majority of the particles in circulation at 3 H post-injection. This is followed by the retention of the particles mostly in the liver in the later time points. The intensity bar represents the %ID/g whereby black = 0 %, white = 15 %ID/g, dark blue = 1 %ID/g and red = approx. 10 %ID/g. Hollow arrowhead highlights the accumulation of particles in the liver. ....8

Figure S8 Representative in vivo PET-CT images of the <sup>89</sup>Zr-labelled HB-HPMA polymers at 3H, 27H and 72H post-injection in MIA PaCa-2 xenograft mice models. (A-C) Distribution behaviour of HB-HPMA-7, HB-HPMA-20 and HB-HPMA-40 at the indicated time points post-injection. White circles highlight the tumour location in each image. The intensity bar of the PET images represents the %ID/g whereby black = 0 %, blue = approx. 4 % and red = approx. 16 %.....9

Figure S9 Comparison between the in vitro time-dependent uptake of HB-HPMA and HB-HPMA-DFO polymers in RAW264.7 macrophage cells at a concentration of 50 µg/m. Cells were cultured for 24h before assay. Hyperbranched polymers were applied in DMEM containing 10 % (v/v) FBS. Data are presented as mean ± S.D (N = 3, n=3).....10

Figure S10 In vitro CellTiter-Glo® 3D cell viability assay for HB-HPMA-7 and HB-HPMA-20 polymers in MIA PaCa-2 pancreatic cancer cell line, (N = 4). ....10

Figure S11 Graphs showing changes in spheroid volume over the 72 hours of incubation with: (A) HB-HPMA-7 and (B) HB-HPMA-20 polymers, (N = 4).....11

Figure S12 Graphs showing changes in spheroid volume over the 72 hours of incubation with: (A) Free GEM and (B) HB-HPMA GEM with monoculture MIA PaCa-2 pancreatic cancer cell line, (N = 4). ....11

Figure S13 *In vitro* CellTiter-Glo® 3D cell viability assay for free GEM and HB-HPMA-GEM in monoculture MIA PaCa-2 pancreatic cancer cell line, (N = 4) .....11

|                                                                                                                                                                                                                                                                                                                               |    |
|-------------------------------------------------------------------------------------------------------------------------------------------------------------------------------------------------------------------------------------------------------------------------------------------------------------------------------|----|
| Figure S14 Graphs showing changes in spheroid volume over the 72 hours of incubation with: (A) free GEM and (B) HB-HPMA GEM with co-culture MIA PaCa-2 pancreatic cancer cell line, (N = 4).....                                                                                                                              | 12 |
| Figure S15 Representative <sup>1</sup> H NMR spectra for HPMA-DFO conjugation. Top) HPMA-DFO polymer. Middle) HPMA polymer and Bottom) DFO. ....                                                                                                                                                                              | 12 |
| Figure S16 Radiographic TLC of all three polymers after <sup>89</sup> Zr labelling +/-DTPA. The signals at the bottom of the TLC represent polymer-bound radioisotope and any movement up the plate represents unbound <sup>89</sup> Zr (+DTPA plate) or free DFO in the sample bound to <sup>89</sup> Zr (-DTPA plate). .... | 13 |
| Figure S17 <sup>1</sup> H NMR spectrum of HPMA monomer in CDCl <sub>3</sub> .....                                                                                                                                                                                                                                             | 13 |
| Figure S18 <sup>13</sup> C NMR spectrum of HPMA monomer in CDCl <sub>3</sub> .....                                                                                                                                                                                                                                            | 14 |
| Figure S19 <sup>1</sup> H NMR spectrum of EDMA in CDCl <sub>3</sub> . ....                                                                                                                                                                                                                                                    | 14 |
| Figure S20 <sup>13</sup> C NMR spectrum of EDMA in CDCl <sub>3</sub> . ....                                                                                                                                                                                                                                                   | 15 |
| Figure S21 <sup>1</sup> H NMR spectrum of Alkyne-CTA in CDCl <sub>3</sub> .....                                                                                                                                                                                                                                               | 15 |
| Figure S22 <sup>13</sup> C NMR spectrum of Alkyne-CTA in CDCl <sub>3</sub> . ....                                                                                                                                                                                                                                             | 16 |

Table S1 Reaction conditions used for the synthesis of the hyperbranched HPMA polymers

| Polymer    | HPMA (mg) | EDMA (mg) | RAFT agent (mg) | Initiator (mg) | Solvent (mL) | Time (hr) | % conversion | Yield (%) |
|------------|-----------|-----------|-----------------|----------------|--------------|-----------|--------------|-----------|
| HPMA-HB-7  | 200       | 13.71     | 21              | 2.3            | 1.6          | 24        | 90           | 76        |
| HPMA-HB-20 | 200       | 13.71     | 21              | 2.3            | 1.2          | 18        | 93           | 74        |
| HPMA-HB-40 | 200       | 13.71     | 21              | 2.3            | 0.8          | 14        | 97           | 82        |

Table S2 Details of physical properties of different batches of the hyperbranched polymers.

|                   | HB-HPMA-7         |                   |                   | HB-HPMA-20        |                   |                   | HB-HPMA-40        |                   |
|-------------------|-------------------|-------------------|-------------------|-------------------|-------------------|-------------------|-------------------|-------------------|
|                   | Batch 1           | Batch 2           | Batch 3           | Batch 1           | Batch 2           | Batch 3           | Batch 1           | Batch 2           |
| $M_n$ GPC (g/mol) | $1.8 \times 10^4$ | $2.4 \times 10^4$ | $1.5 \times 10^4$ | $1.1 \times 10^5$ | $9.4 \times 10^4$ | $1.6 \times 10^5$ | $1.8 \times 10^6$ | $1.1 \times 10^6$ |
| $\bar{D}$         | 2.1               | 2.2               | 2.1               | 2.5               | 1.3               | 2.0               | 3.1               | 3.9               |
| Size DLS (nm)     | 7                 | 7                 | 7                 | 20                | 20                | 19                | 40                | 39                |

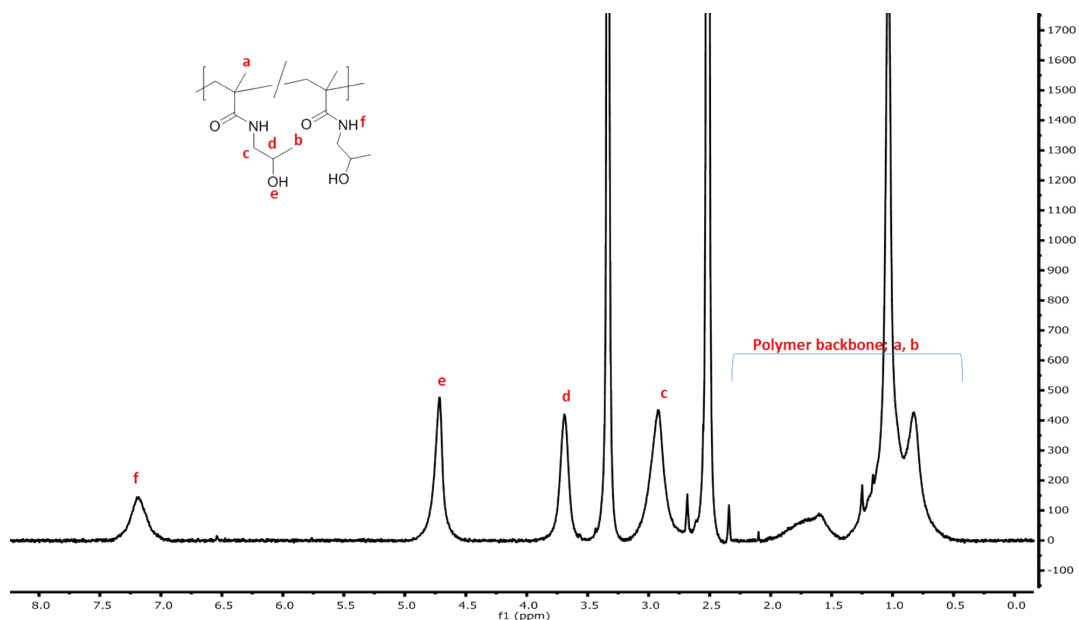

Figure S1 Representative <sup>1</sup>H NMR spectrum of hyperbranched HPMA polymer (HB-HPMA) in DMSO-d<sub>6</sub>.

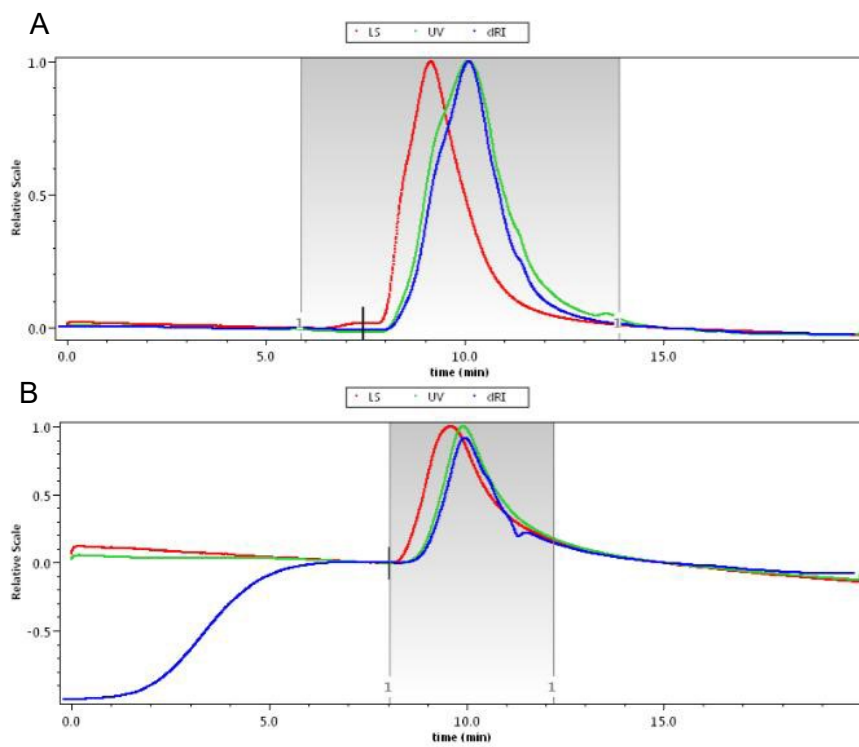

Figure S2 Representative SEC-MALLS traces of (A) HB-HPMA polymers (HB-HPMA-20) and (B) HB-HPMA-GEM polymers.

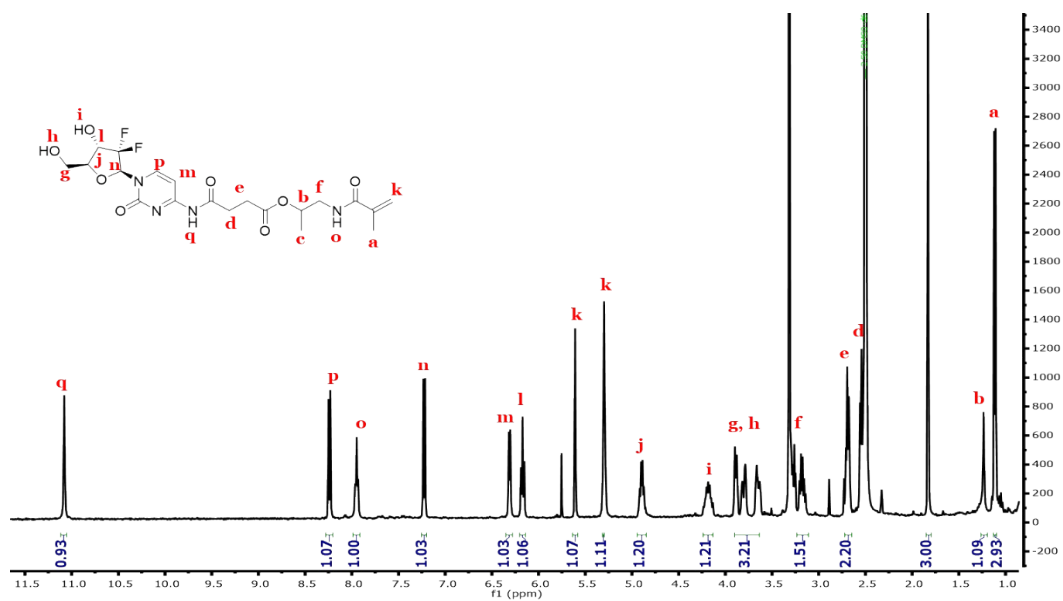

Figure S3  $^1\text{H}$  NMR spectrum of HPMA-GEM monomer in  $\text{DMSO-d}_6$

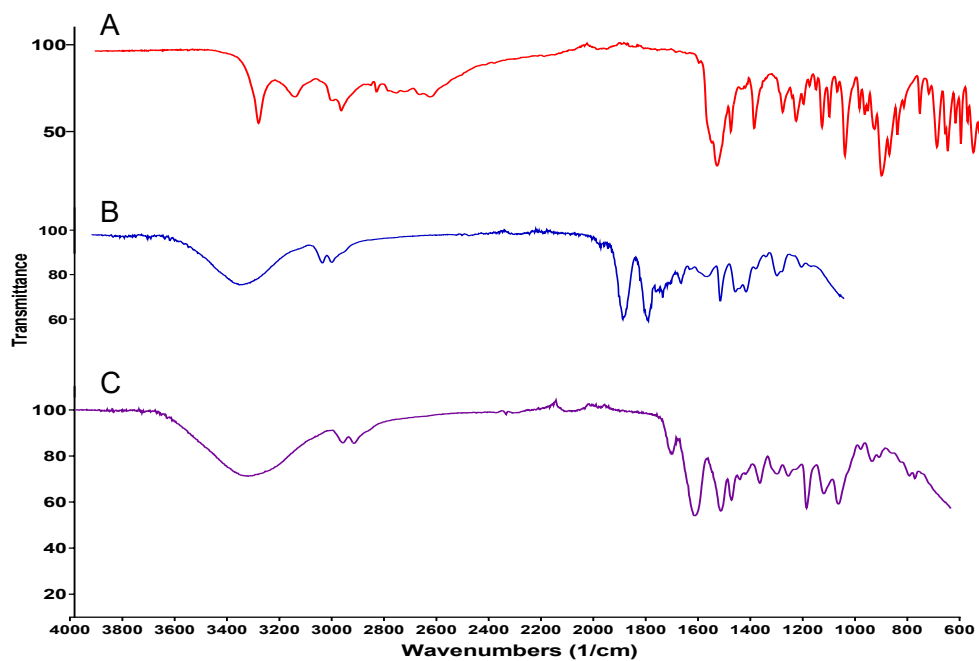

Figure S4 FT-IR spectra of (A) GEM, (B) control HPMA polymer and (C) HPMA-GEM prodrug polymer.

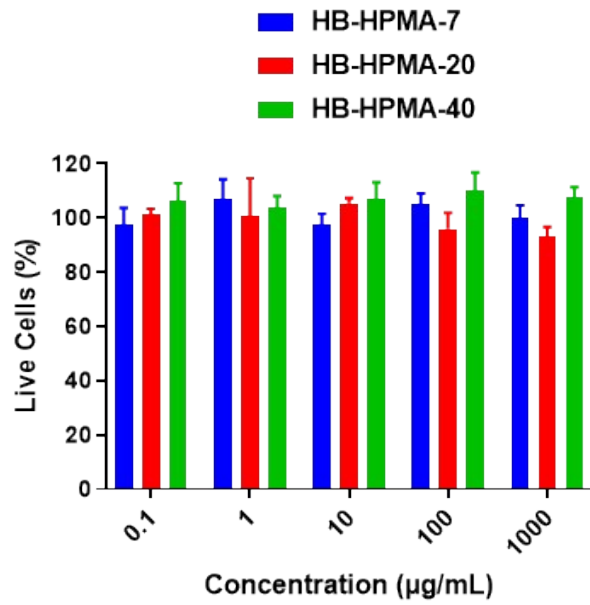

Figure S5. In vitro 2D cell viability assay at 72h post-treatment with different concentrations of the three HB-HPMA polymers on MIA PaCa-2 pancreatic cancer cell line using trypan blue dye exclusion test of cell viability.

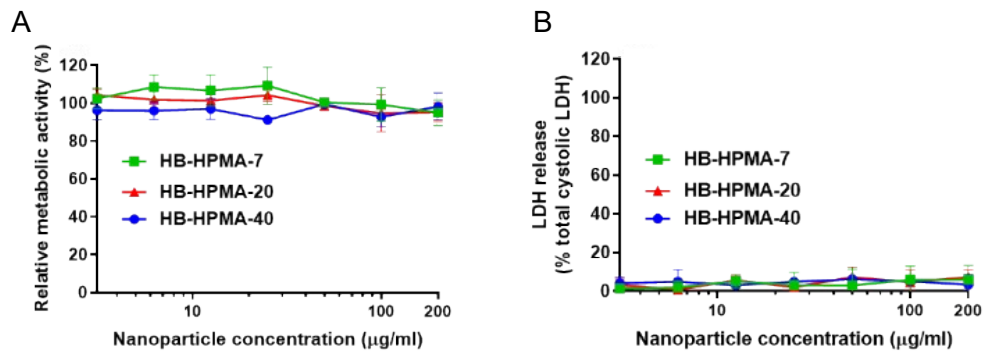

Figure S6 Evaluation of HB-HPMA polymers biocompatibility in RAW 264.7 macrophages polymers applied in 10 % FBS/DMEM for 24 hours, (1) PrestoBlue™ cell metabolic assay (2) LDH release assay. Data are presented as mean ± S.D (N = 3, n = 3).

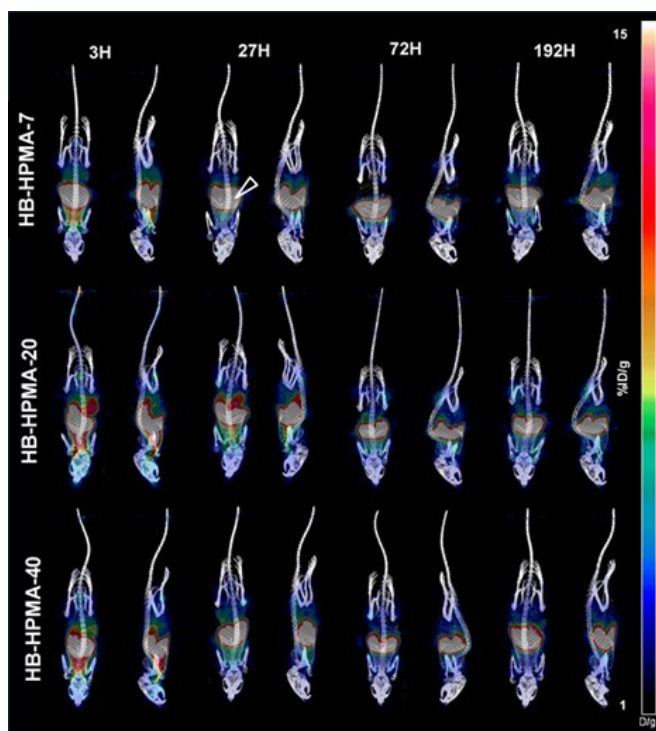

Figure S7 PET-CT imaging of  $^{89}\text{Zr}$ -labelled HB-HPMA polymers in MIA PaCa-2 xenograft models. Representative two orientation maximum intensity projection (MIP) images of all three polymers showing the majority of the particles in circulation at 3 H post-injection. This is followed by the retention of the particles mostly in the liver in the later time points. The intensity bar represents the %ID/g whereby black = 0 %, white = 15 %ID/g, dark blue = 1 %ID/g and red = approx. 10 %ID/g. Hollow arrowhead highlights the accumulation of particles in the liver.



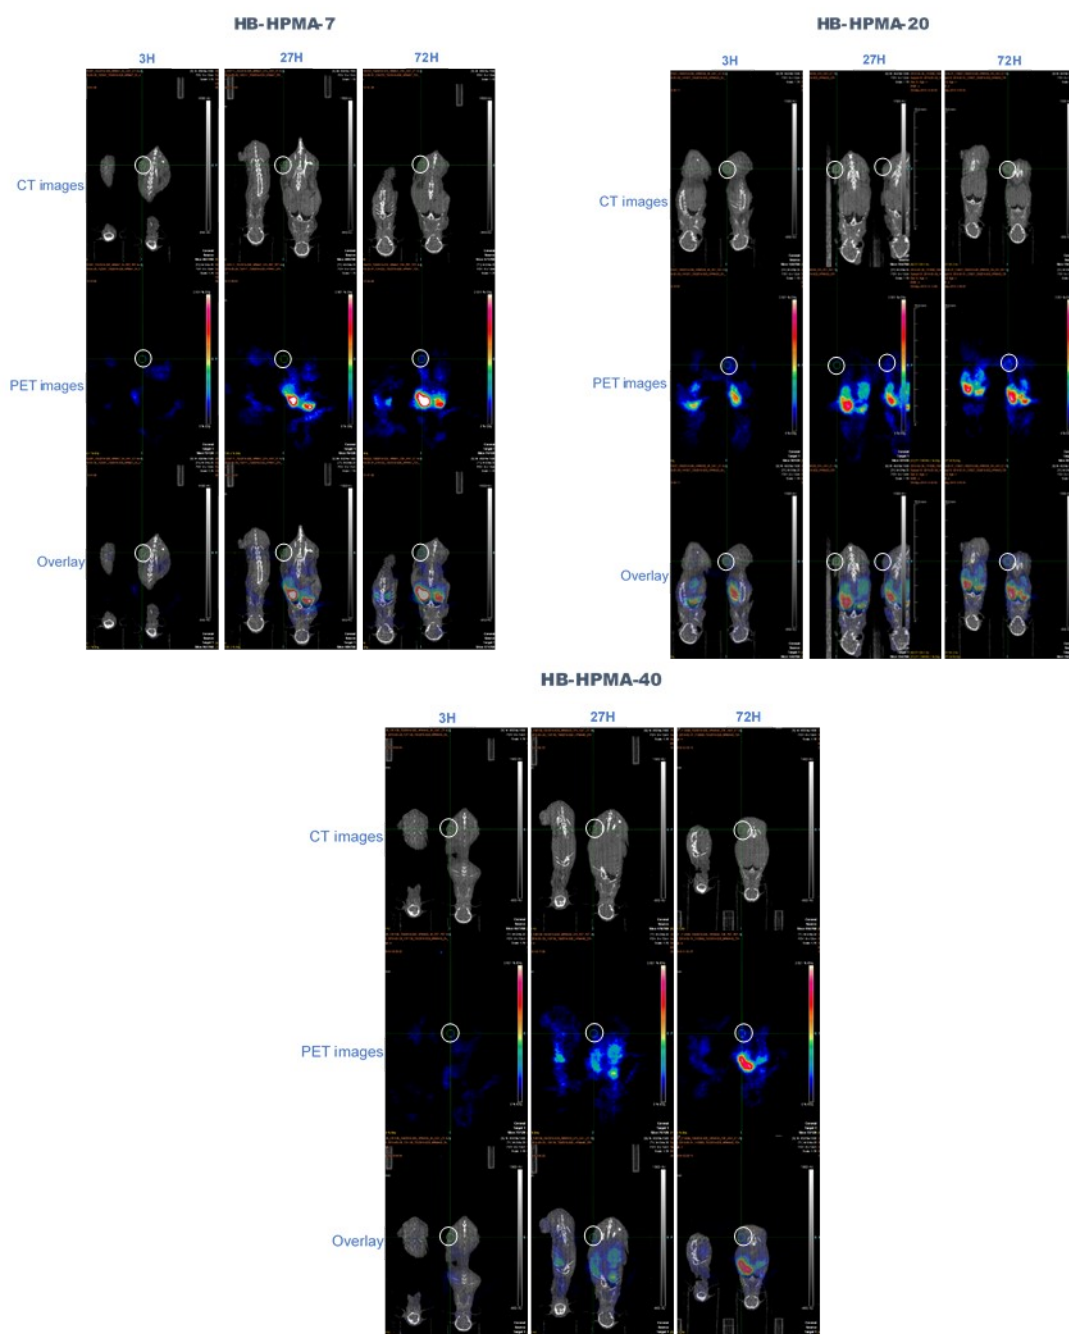

Figure S8 Representative in vivo PET-CT images of the  $^{89}\text{Zr}$ -labelled HB-HPMA polymers at 3H, 27H and 72H post-injection in MIA PaCa-2 xenograft mice models. (A-C) Distribution behaviour of HB-HPMA-7, HB-HPMA-20 and HB-HPMA-40 at the indicated time points post-injection. White circles highlight the tumour location in each image. The intensity bar of the PET images represents the %ID/g whereby black = 0 %, blue = approx. 4 % and red = approx. 16 %.

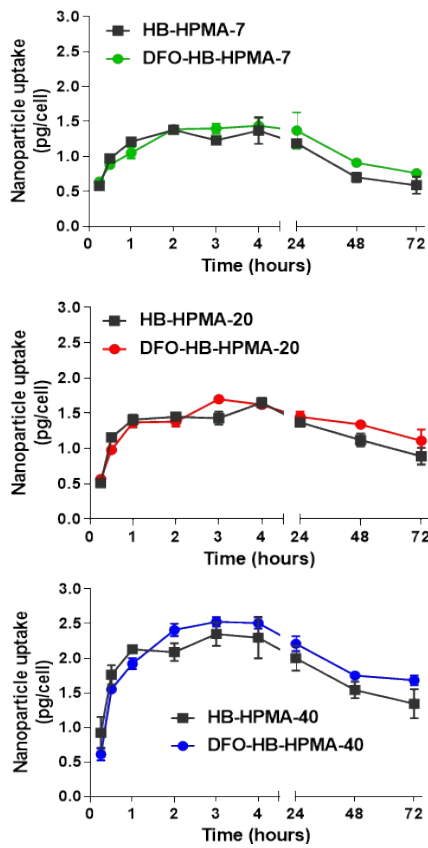

Figure S9 Comparison between the in vitro time-dependent uptake of HB-HPMA and HB-HPMA-DFO polymers in RAW264.7 macrophage cells at a concentration of 50  $\mu\text{g}/\text{m}$ . Cells were cultured for 24h before assay. Hyperbranched polymers were applied in DMEM containing 10 % (v/v) FBS. Data are presented as mean  $\pm$  S.D (N = 3, n=3).

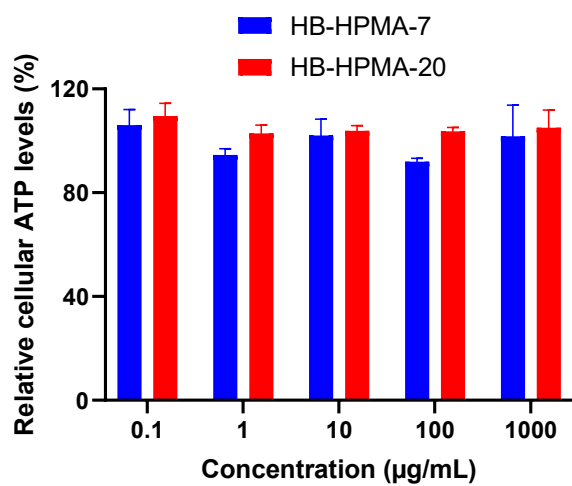

Figure S10 In vitro CellTiter-Glo<sup>®</sup> 3D cell viability assay for HB-HPMA-7 and HB-HPMA-20 polymers in MIA PaCa-2 pancreatic cancer cell line, (N = 4).

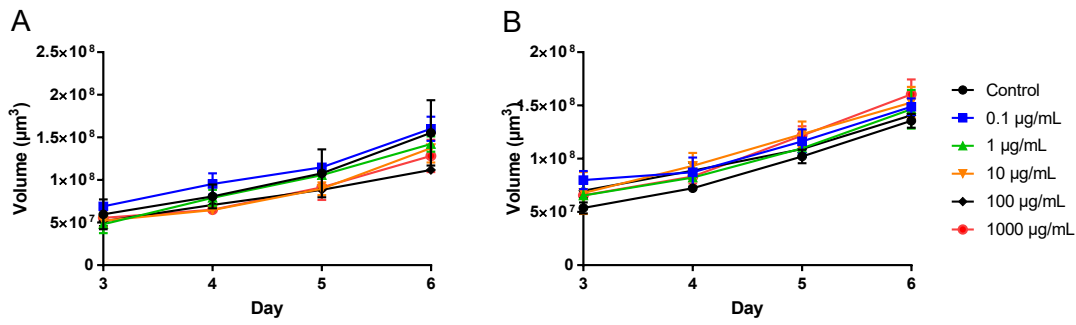

Figure S11 Graphs showing changes in spheroid volume over the 72 hours of incubation with: (A) HB-HPMA-7 and (B) HB-HPMA-20 polymers, (N = 4).

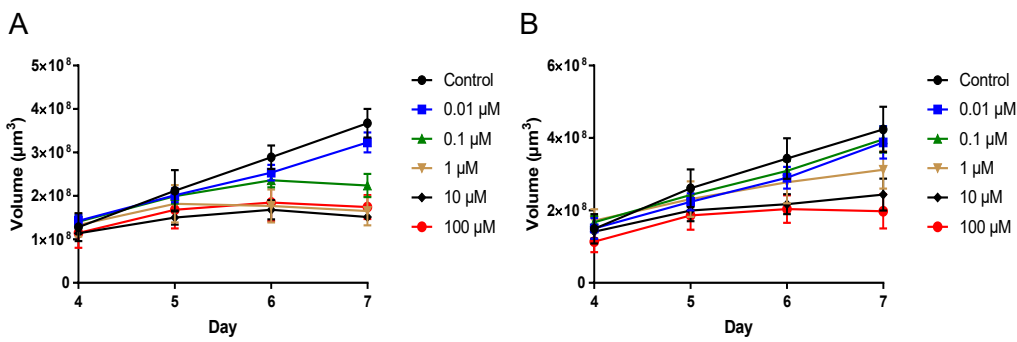

Figure S12 Graphs showing changes in spheroid volume over the 72 hours of incubation with: (A) Free GEM and (B) HB-HPMA GEM with monoculture MIA PaCa-2 pancreatic cancer cell line, (N = 4).

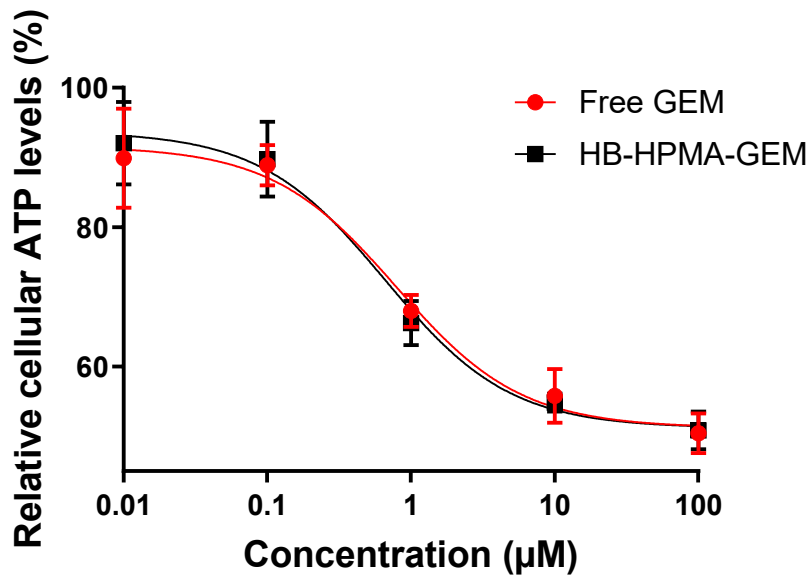

Figure S13 *In vitro* CellTiter-Glo® 3D cell viability assay for free GEM and HB-HPMA-GEM in monoculture MIA PaCa-2 pancreatic cancer cell line, (N = 4)

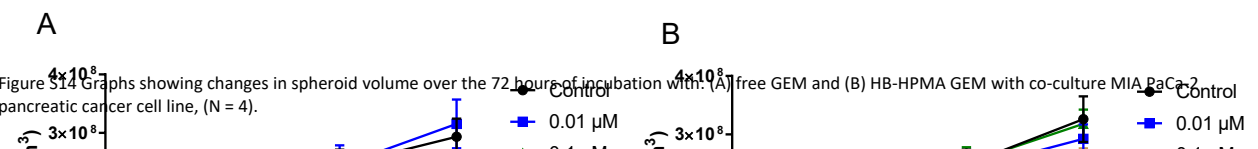

Figure S14 Graphs showing changes in spheroid volume over the 72 hours of incubation with: (A) free GEM and (B) HB-HPMA GEM with co-culture MIA PaCa-2 pancreatic cancer cell line, (N = 4).

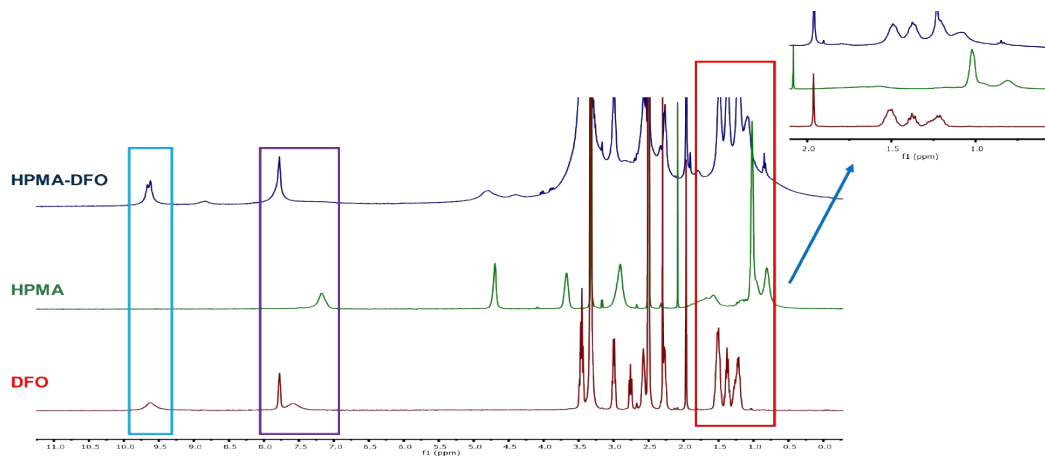

Figure S15 Representative  $^1\text{H}$  NMR spectra for HPMA-DFO conjugation. Top) HPMA-DFO polymer. Middle) HPMA polymer and Bottom) DFO.

Figure S16 Radiographic TLC of all three polymers after  $^{89}\text{Zr}$  labelling +/-DTPA. The signals at the bottom of the TLC represent polymer-bound radioisotope and any movement up the plate represents unbound  $^{89}\text{Zr}$  (+DTPA plate) or free DFO in the sample bound to  $^{89}\text{Zr}$  (-DTPA plate).

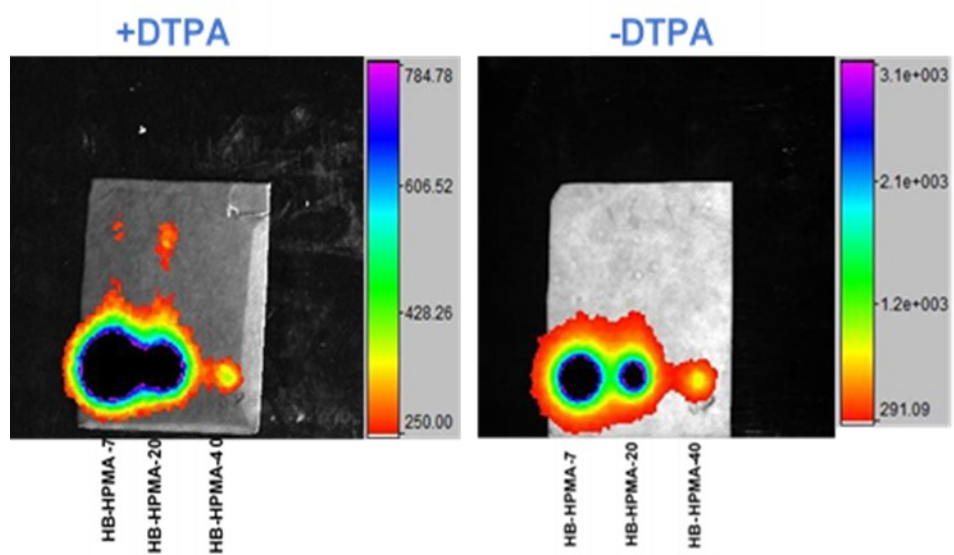

Figure S17 <sup>1</sup>H NMR spectrum of HPMA monomer in CDCl<sub>3</sub>.

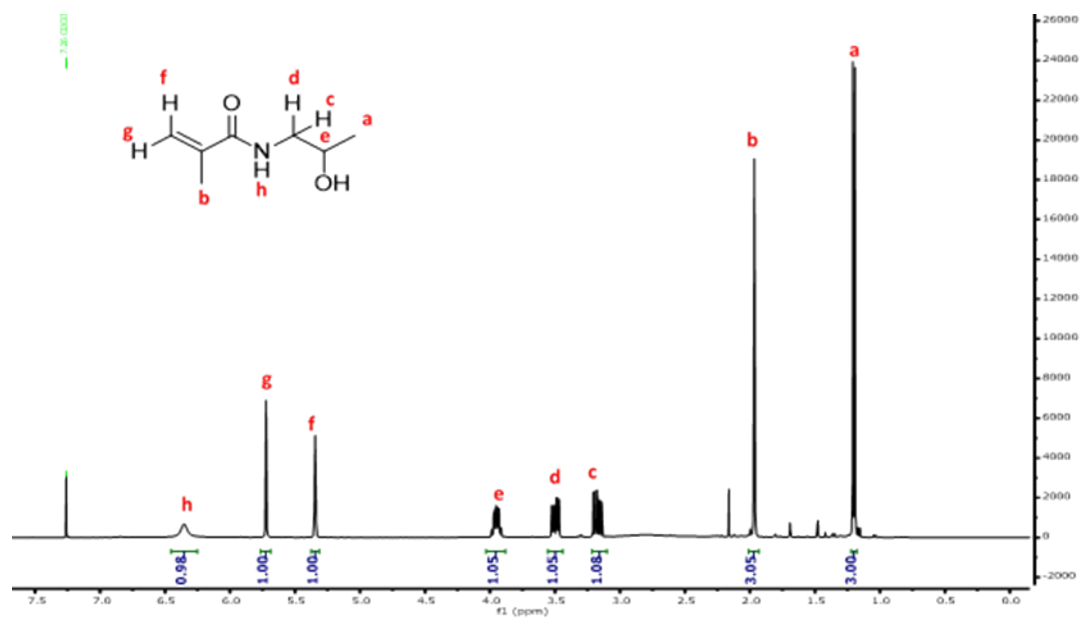

Figure S18 <sup>13</sup>C NMR spectrum of HPMA monomer in CDCl<sub>3</sub>.

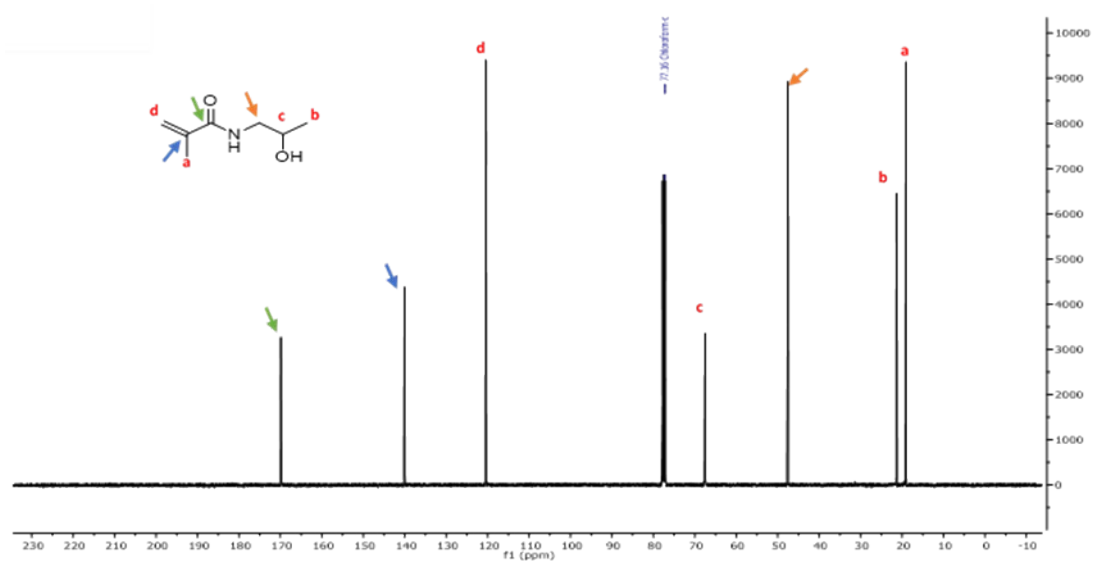

Figure S19  $^1\text{H}$  NMR spectrum of EDMA in  $\text{CDCl}_3$ .

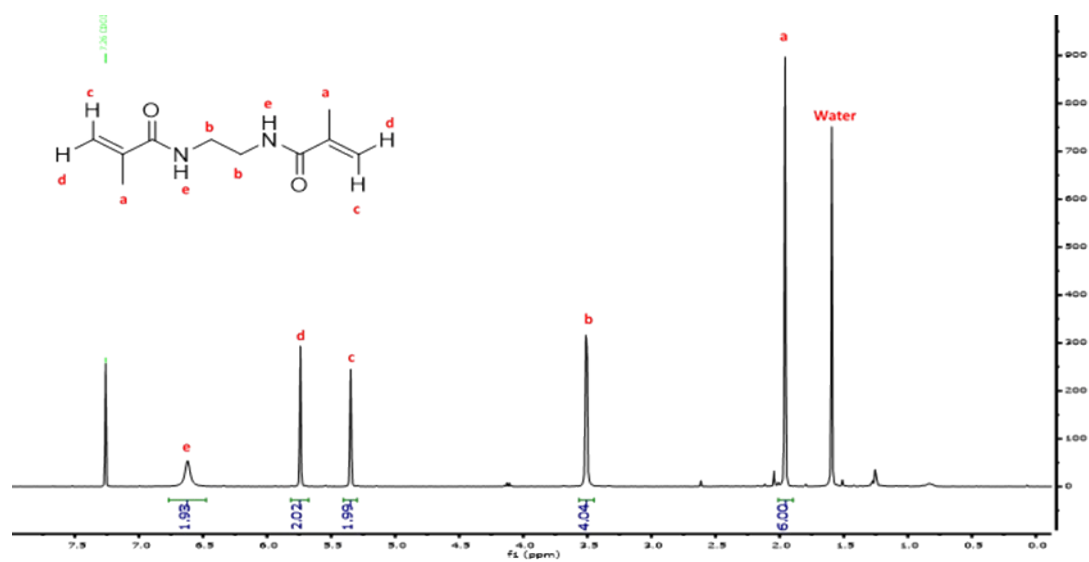



Figure S20  $^{13}\text{C}$  NMR spectrum of EDMA in  $\text{CDCl}_3$ .

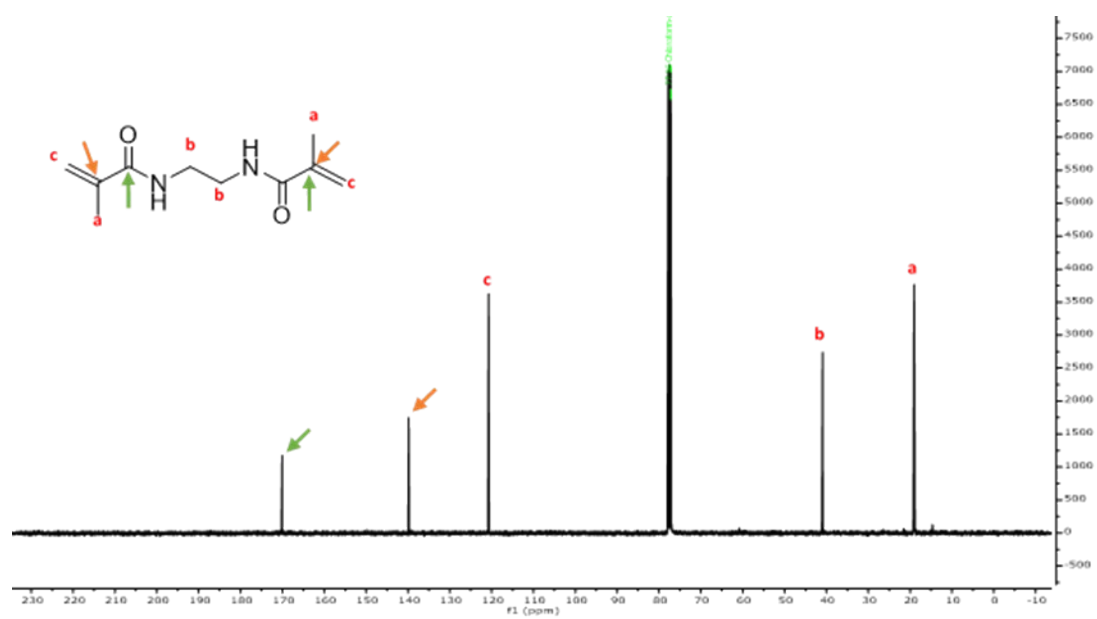

Figure S21  $^1\text{H}$  NMR spectrum of Alkyne-CTA in  $\text{CDCl}_3$ .

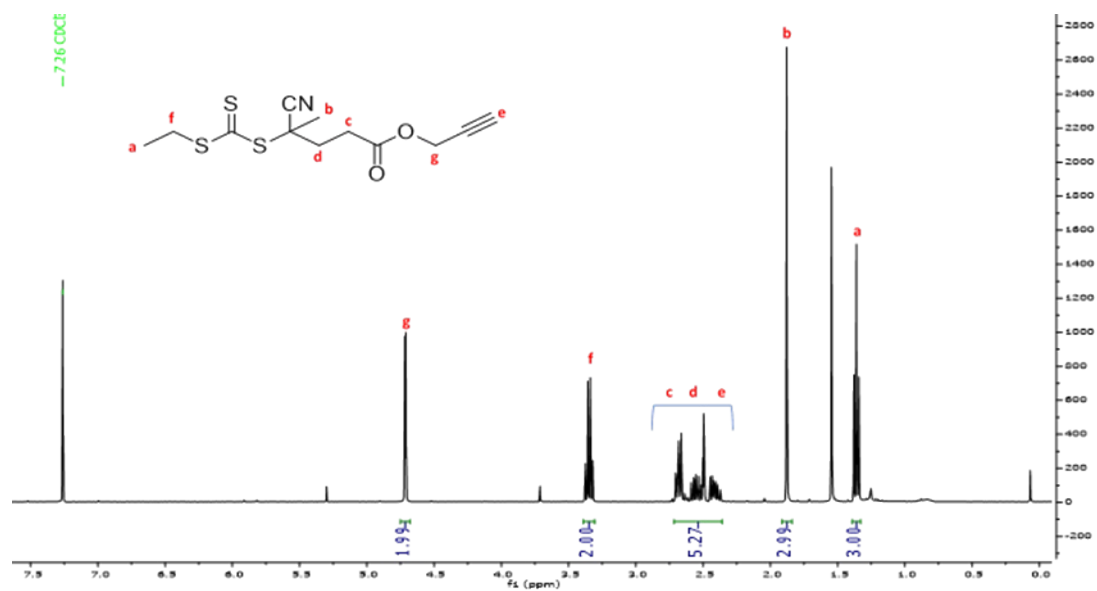

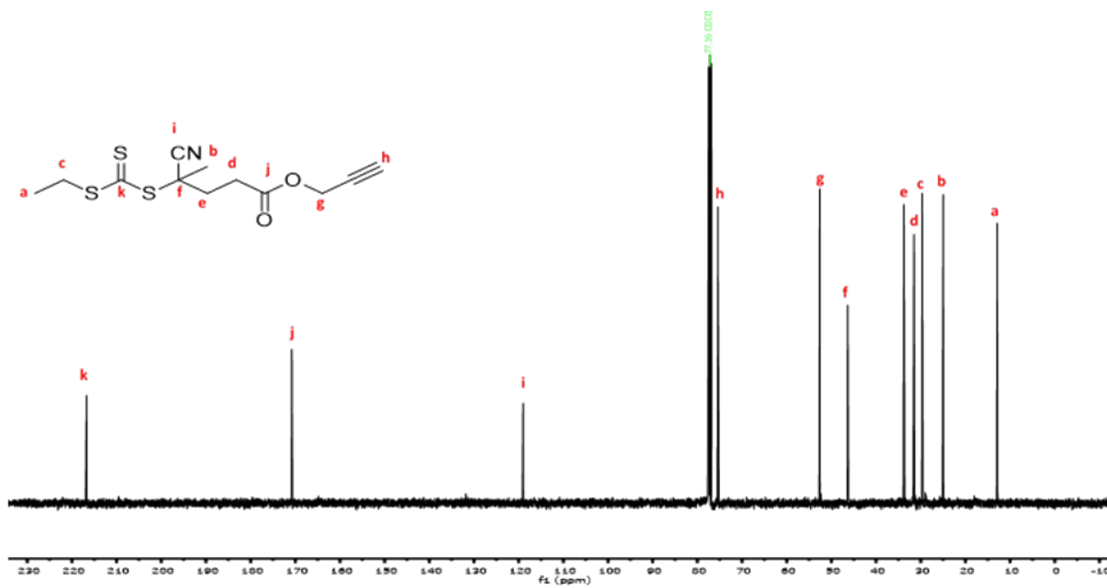

Figure S22  $^{13}\text{C}$  NMR spectrum of Alkyne-CTA in  $\text{CDCl}_3$ .
